# Supplementary material for: Fine-Tuned Reactivity of N-Containing Naphthol Analogues
Source: MDPI journal article supplement (doi:10.3390/ijms232012329), 2022-10-15
Supplement: s1 [file s1]

# Fine-tuned reactivity of *N*-containing naphthol analogues

Oszkár Csuvik <sup>1</sup>, Petra Barta <sup>1</sup>, Antal Csámpai <sup>2,\*</sup>, and István Szatmári <sup>1,3,\*</sup>

<sup>1</sup> Institute of Pharmaceutical Chemistry, University of Szeged, Eötvös u. 6, H-6720 Szeged, Hungary

<sup>2</sup> Department of Organic Chemistry, Eötvös Loránd University, P.O. Box 32, H-1518 Budapest, Hungary

<sup>3</sup> Stereochemistry Research Group, Eötvös Loránd Research Network, University of Szeged, Eötvös u. 6, H-6720 Szeged, Hungary

\* Correspondence: antal.csampai@ttk.elte.hu (A.C.); szatmari.istvan@szte.hu (I.S.)

## Contents

|                                                                                      |   |
|--------------------------------------------------------------------------------------|---|
| 1. <sup>1</sup> H NMR, and <sup>13</sup> C NMR spectra of synthesised compounds..... | 2 |
|--------------------------------------------------------------------------------------|---|

**5-(hydroxy(naphthalen-1-yl)methyl)quinolin-6-ol (5)**

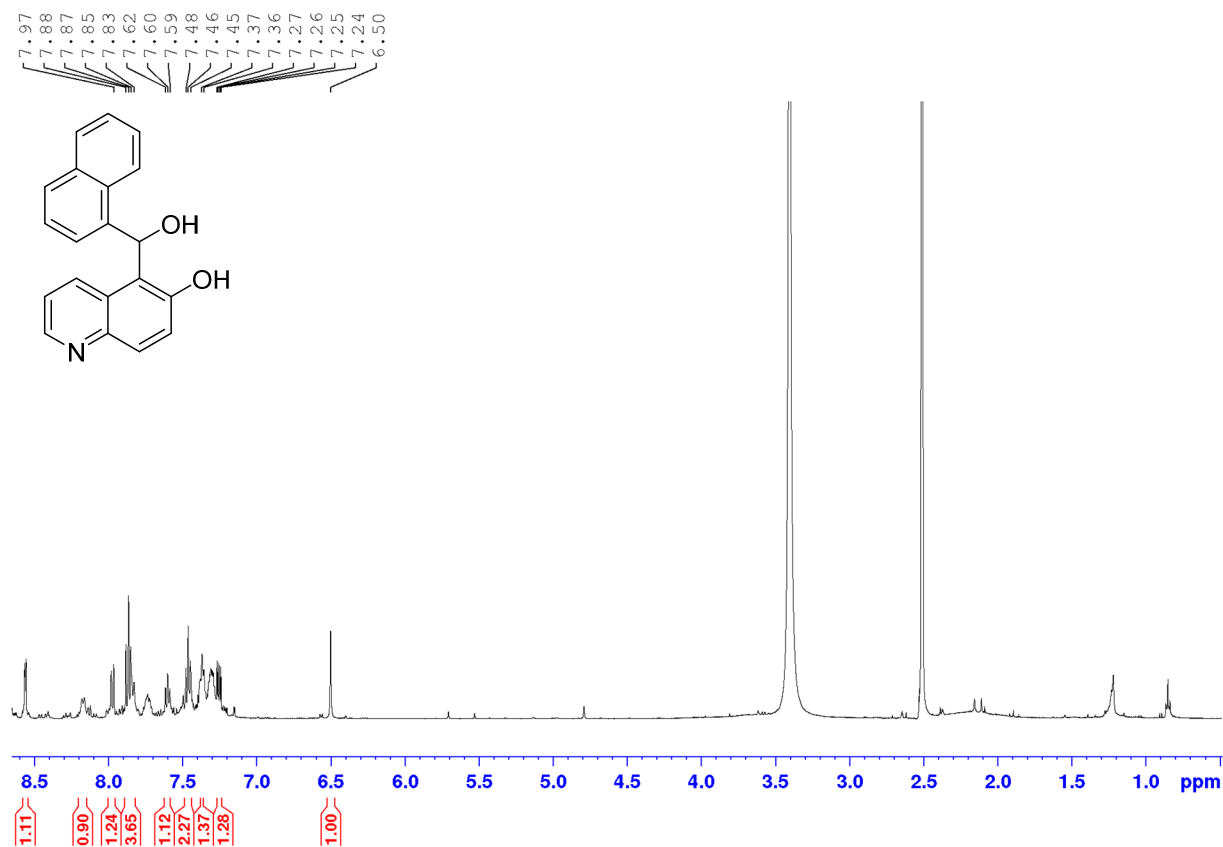

Figure S1. <sup>1</sup>H-NMR spectrum of 5

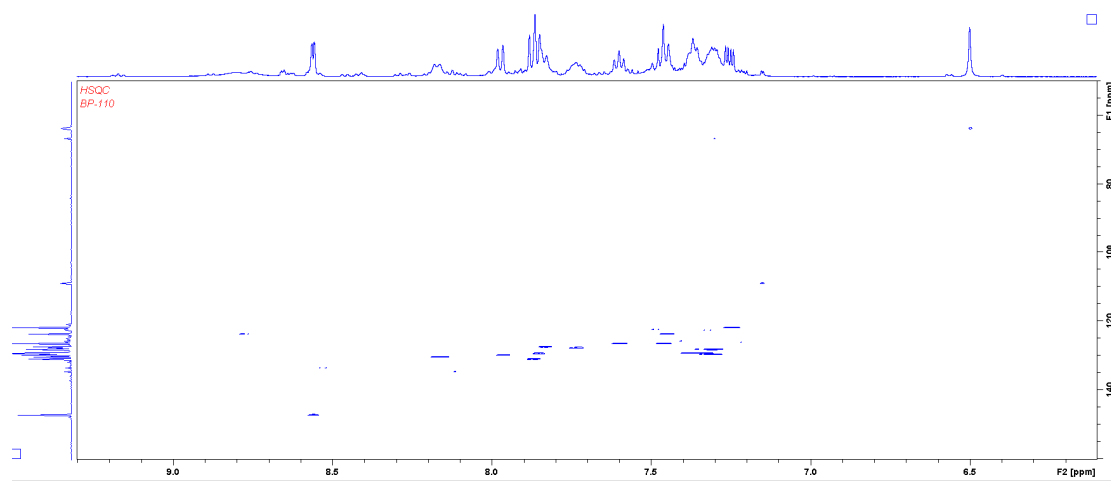

Figure S2. HSQC spectrum of 5

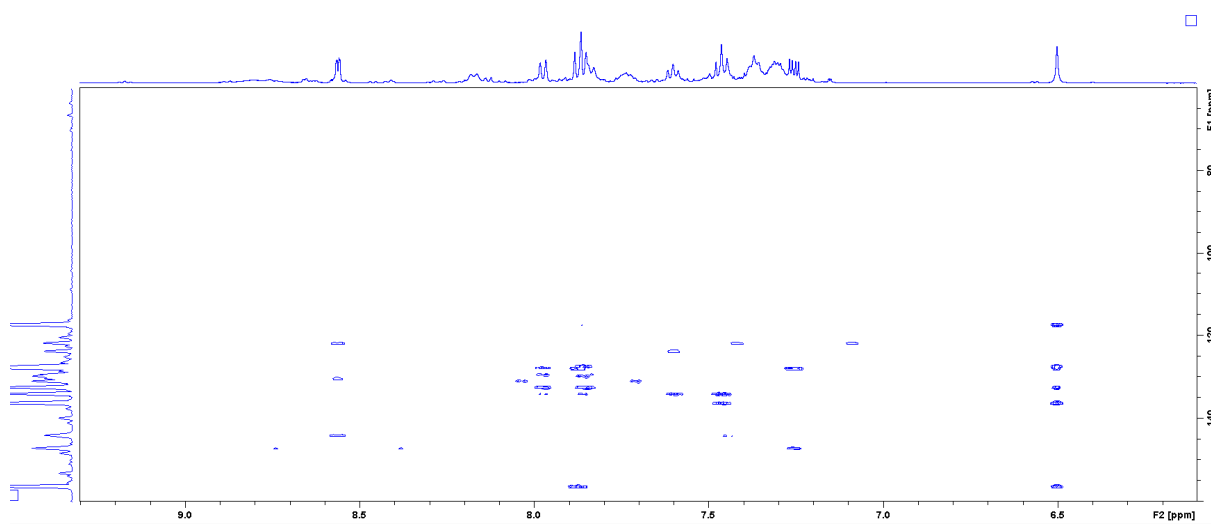

Figure S3. HMBC spectrum of **5**

5-(morpholino(naphthalen-1-yl)methyl)quinolin-6-ol (7)

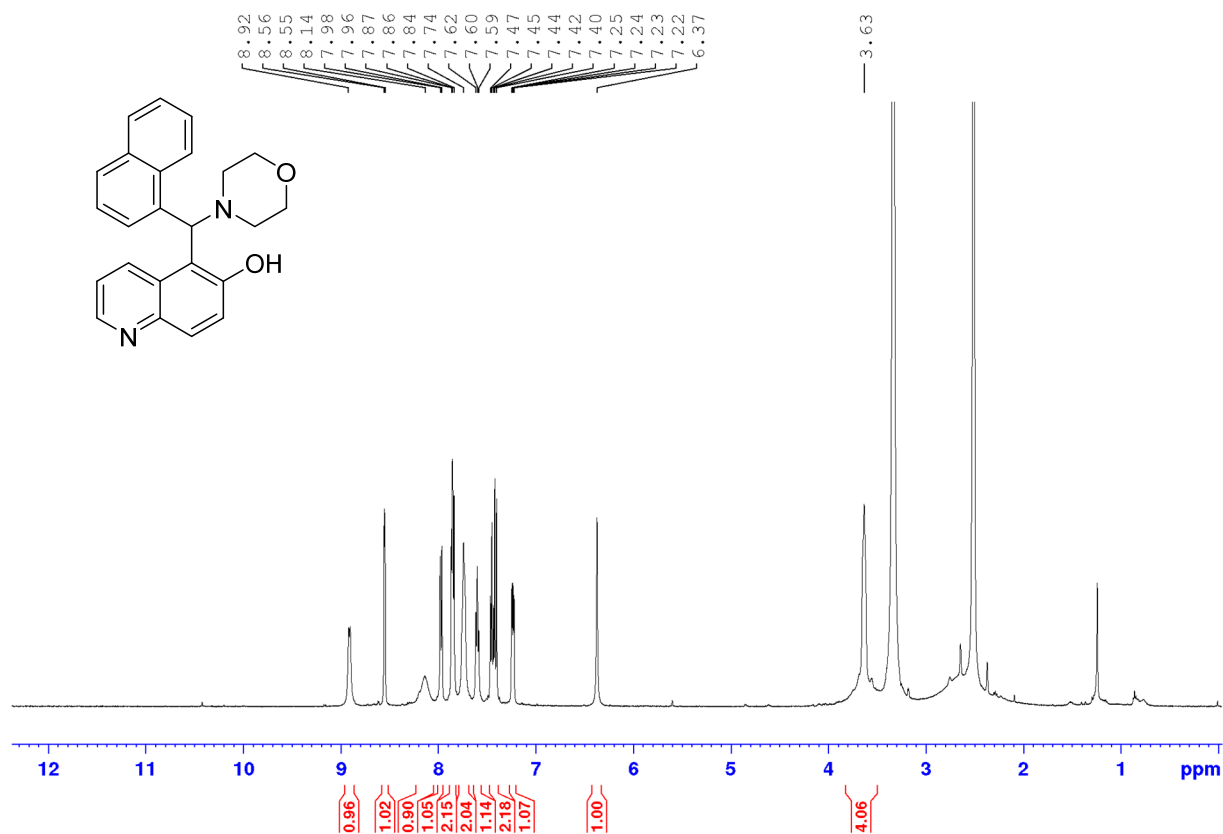

Figure S4. <sup>1</sup>H-NMR spectrum of 7

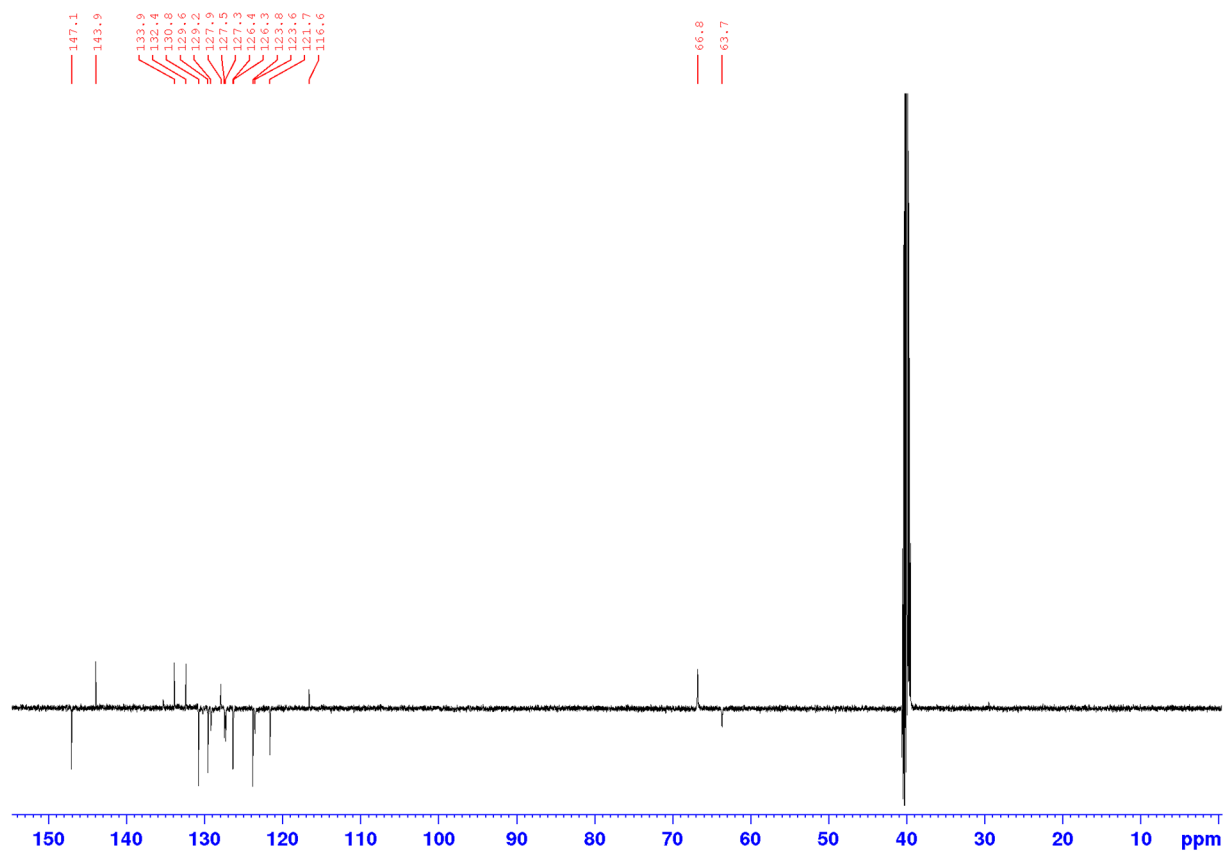

Figure S5. <sup>13</sup>C-NMR spectrum of 7

**1-methoxy-4-(naphthalen-1-ylmethylene)-1,2-dihydroisoquinolin-3(4H)-one (10)**

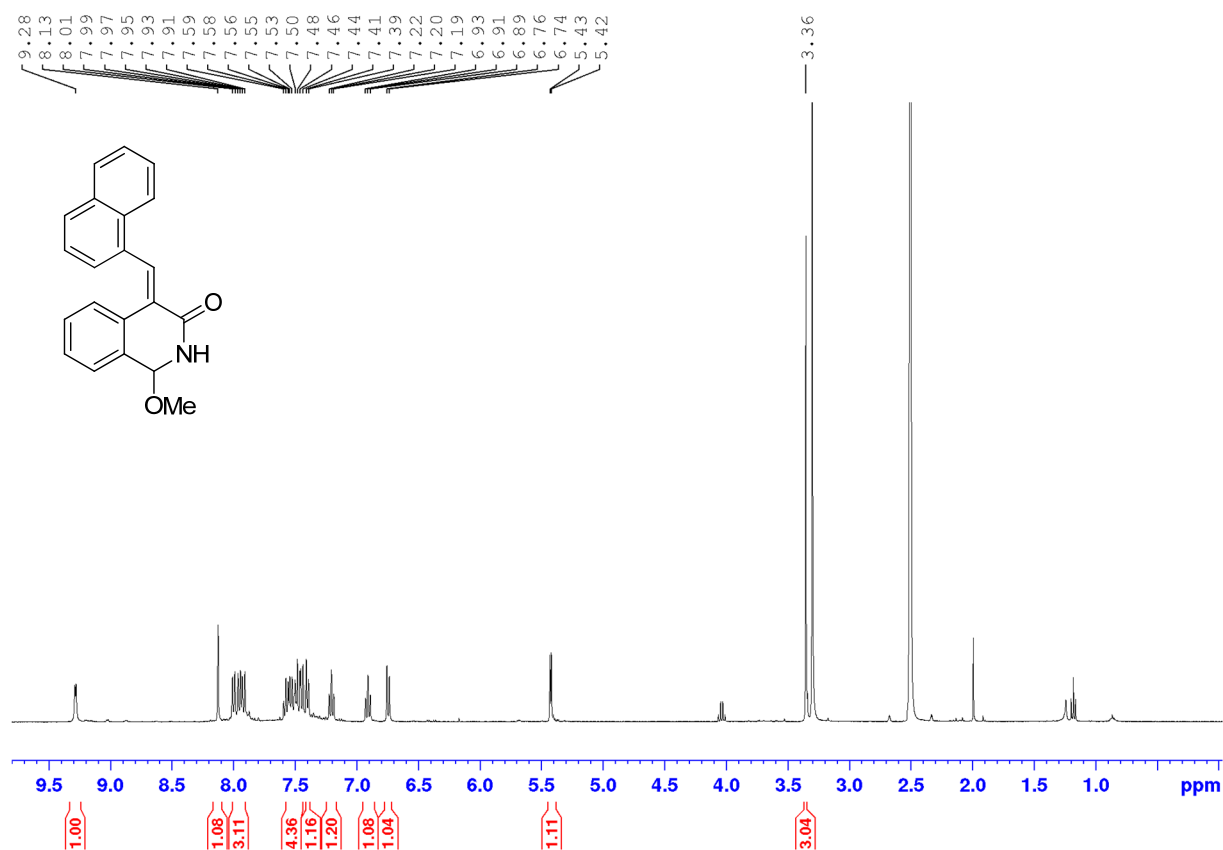

Figure S6. <sup>1</sup>H-NMR spectrum of 10

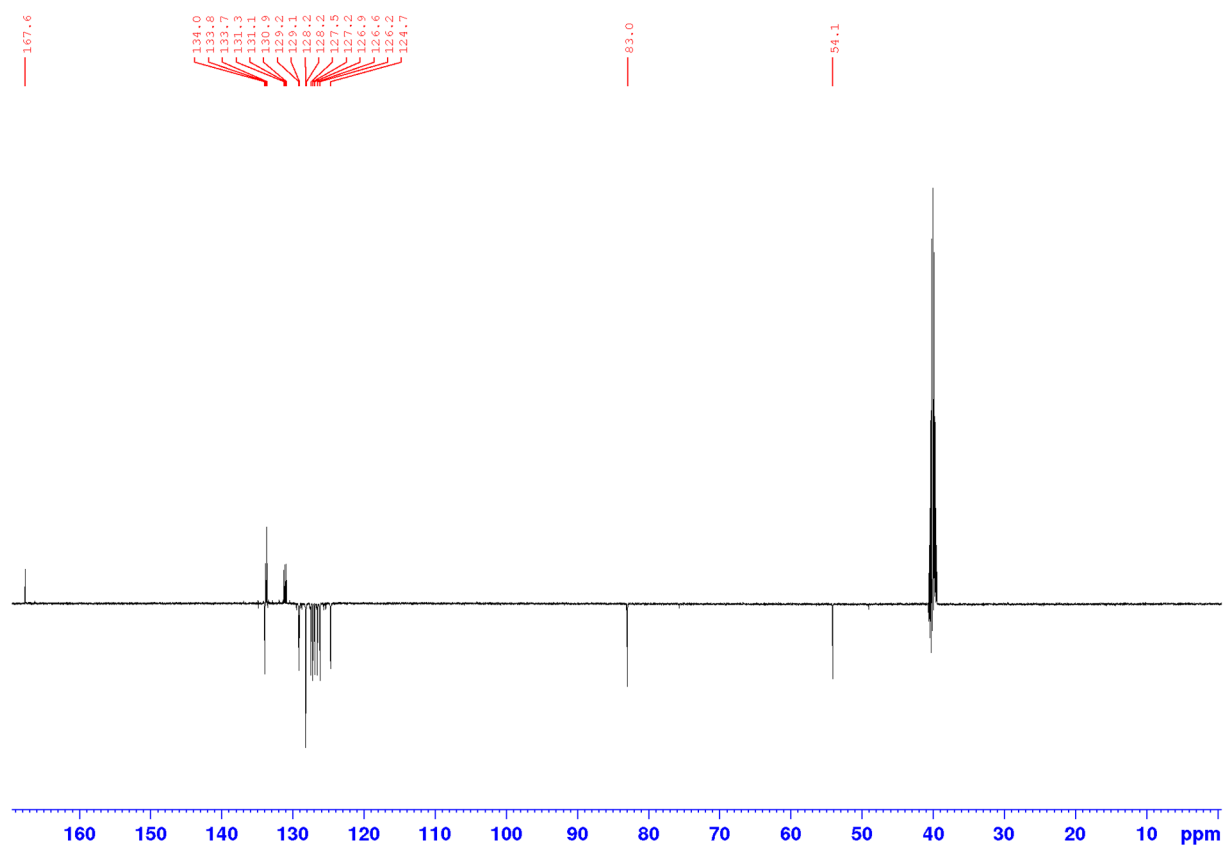

Figure S7. <sup>13</sup>C-NMR spectrum of 10

**3'-Hydroxy-1,2-dihydro-[1,4'-biisoquinolin]-3(4H)-one (11a)**

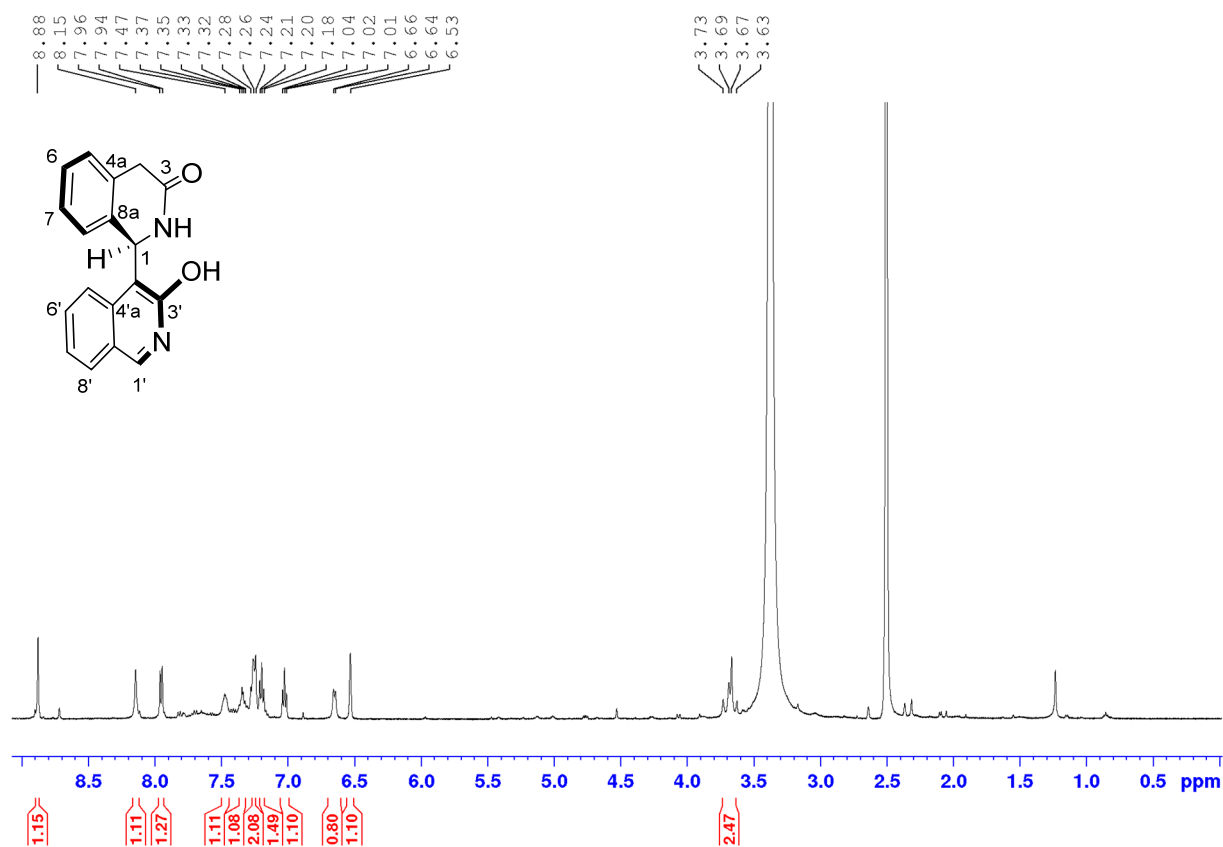

Figure S8. <sup>1</sup>H-NMR spectrum of **11a**

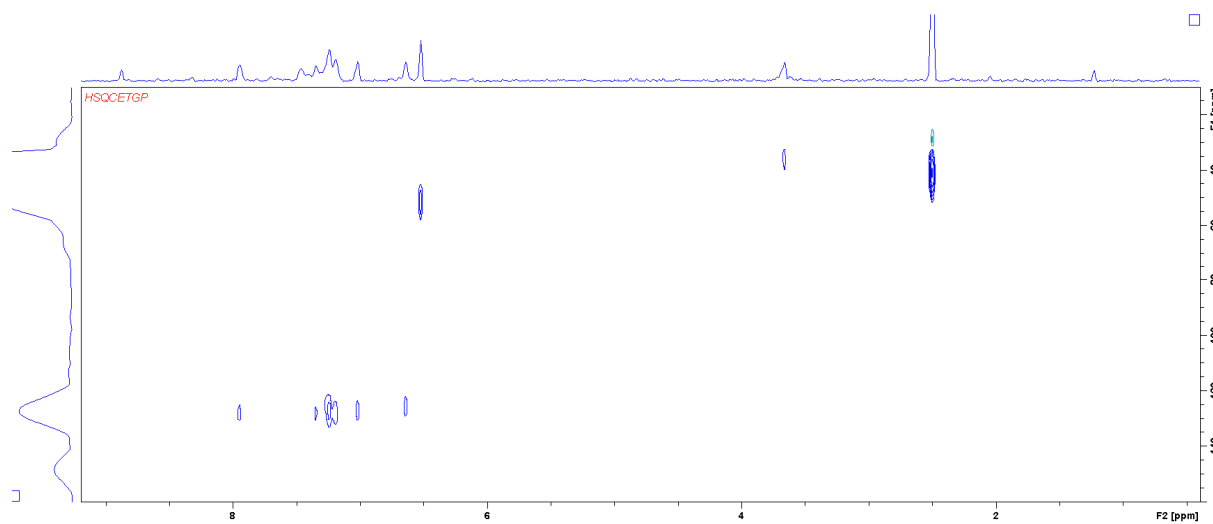

Figure S9. HSQC spectrum of **11a**

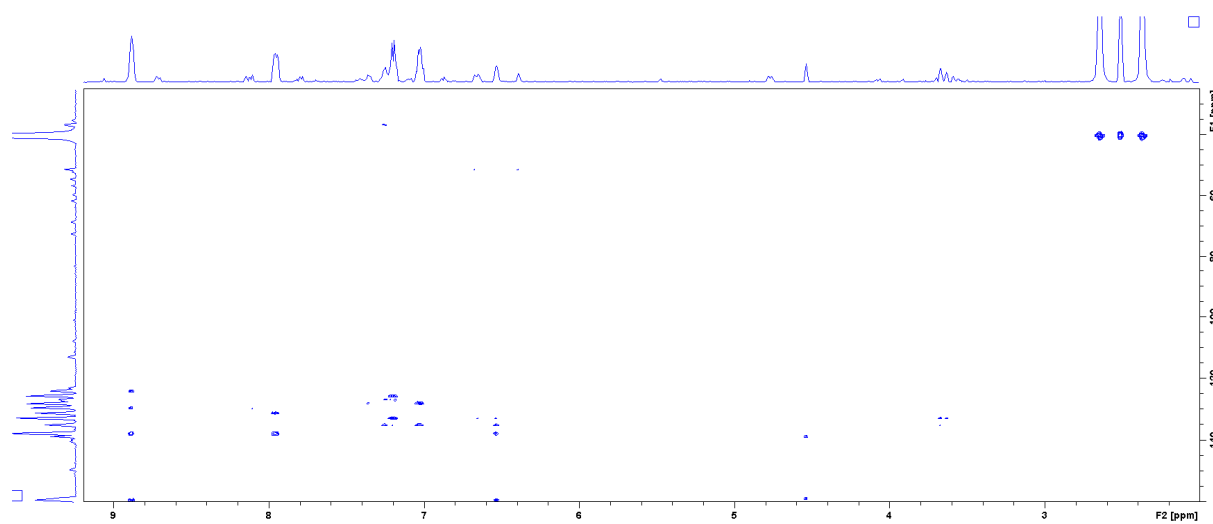

Figure S10. HMBC spectrum of **11a**

**4-((Benzyl(methyl)amino)(phenyl)methyl)isoquinolin-3-ol (11b)**

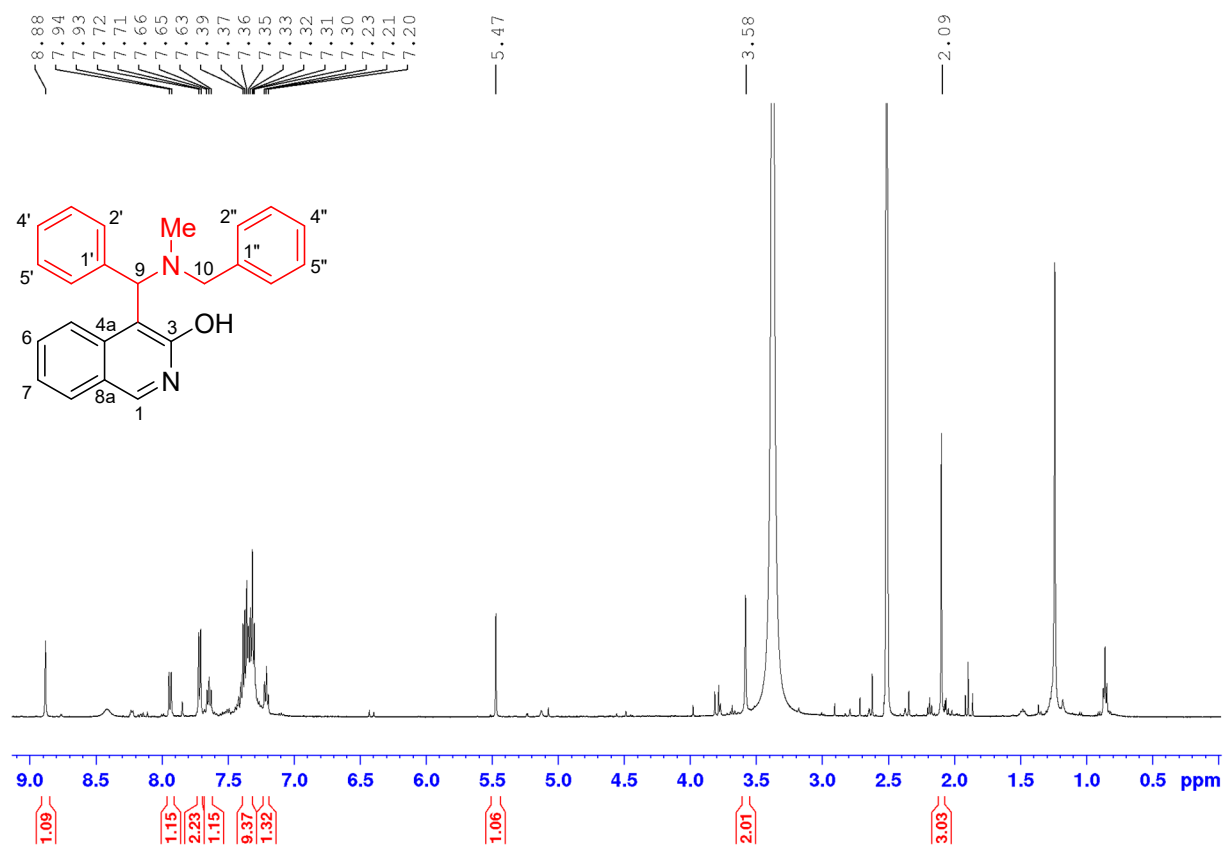

Figure S11. <sup>1</sup>H-NMR spectrum of **11b**

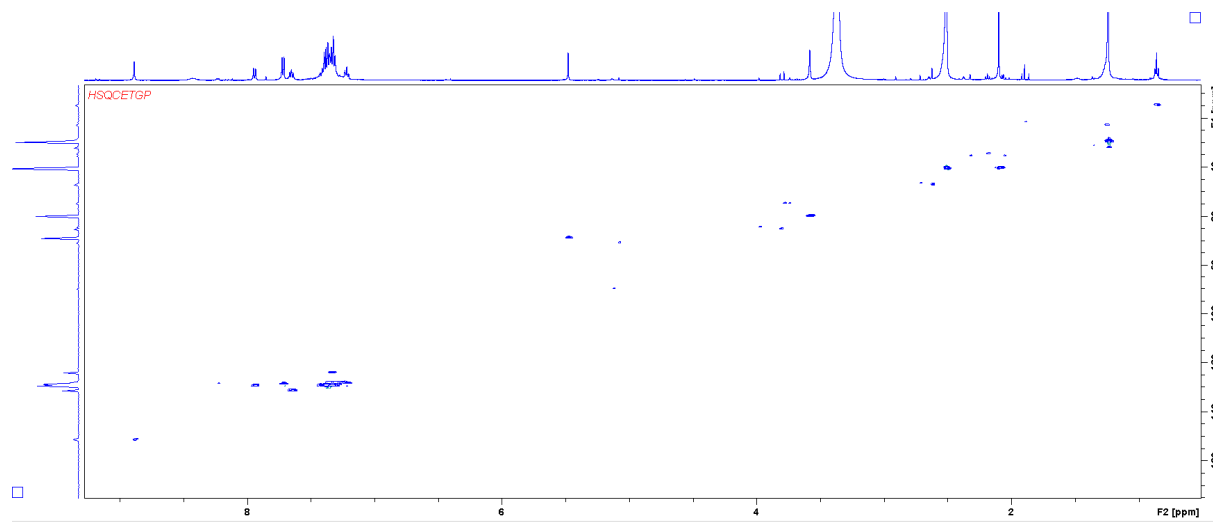

Figure S12. <sup>13</sup>C-NMR spectrum of **11b**

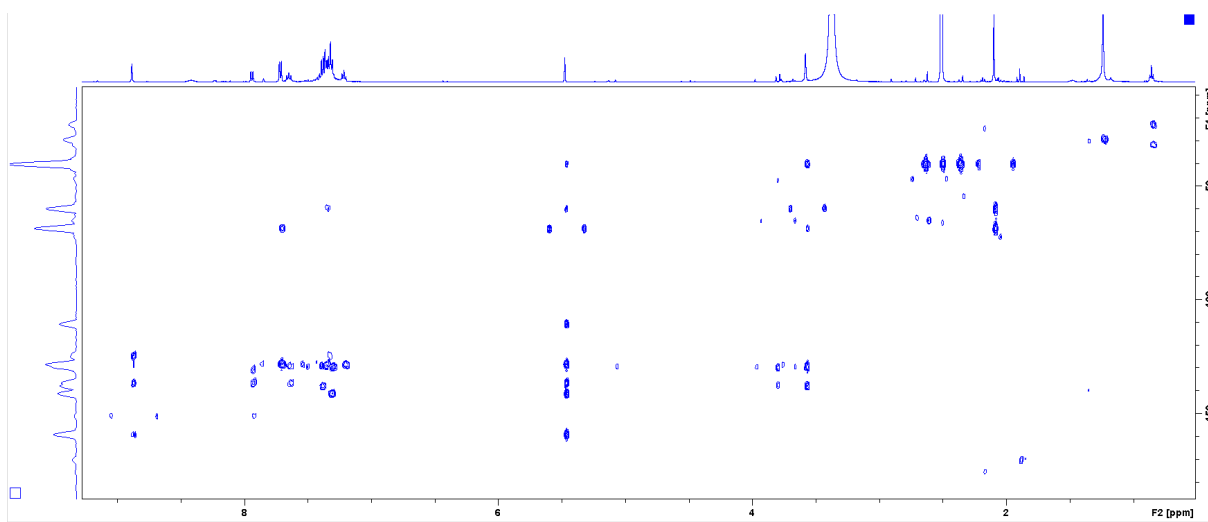

Figure S13.  $^{13}\text{C}$ -NMR spectrum of **11b**

**1-morpholino-1,2-dihydroisoquinolin-3(4H)-one (18)**

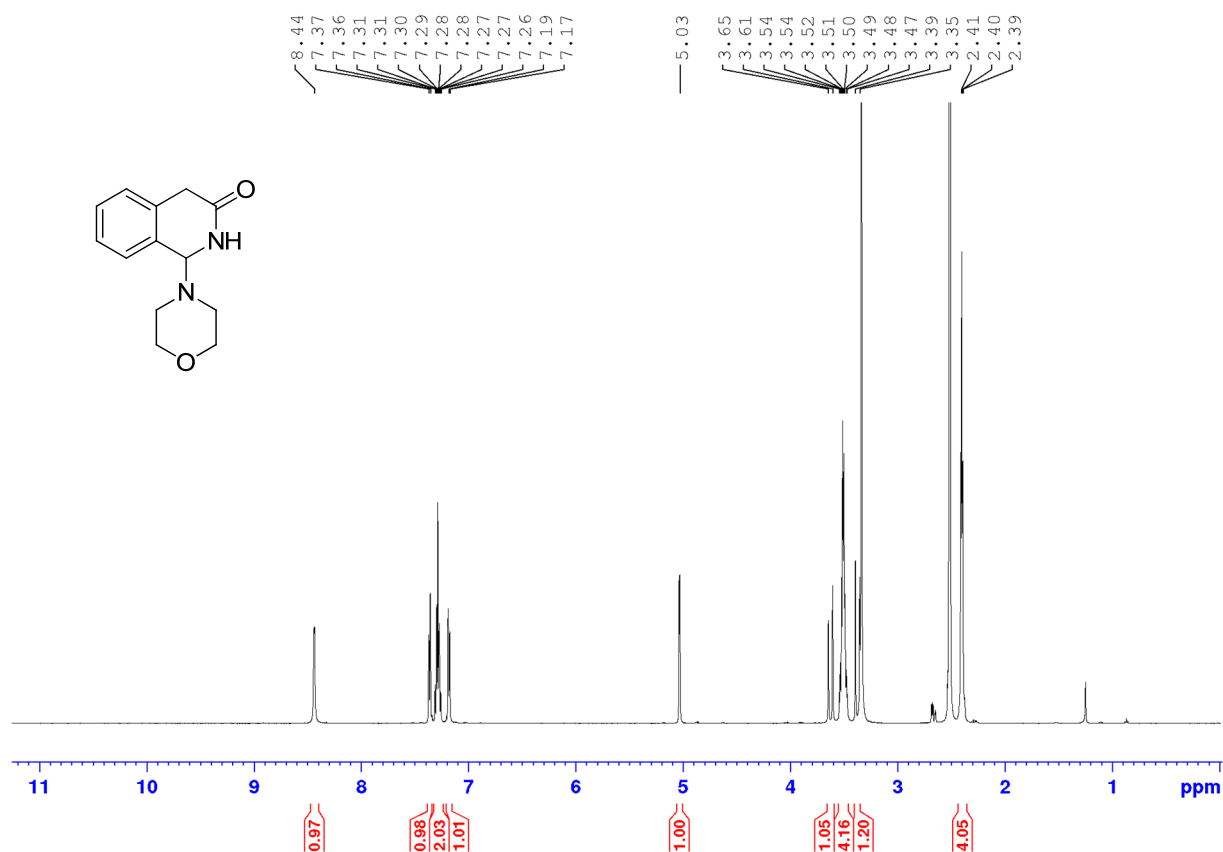

Figure S14. <sup>1</sup>H-NMR spectrum of **18**

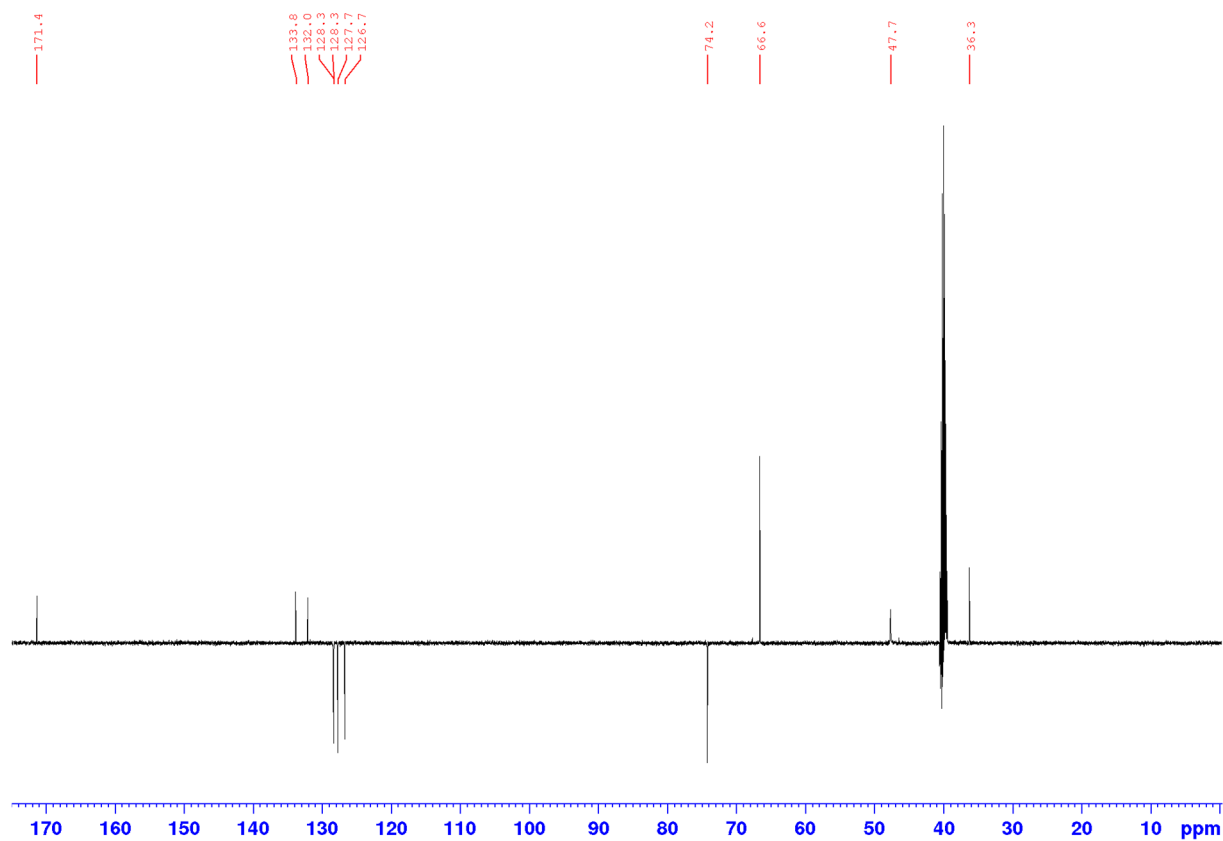

Figure S15. <sup>13</sup>C-NMR spectrum of **18**

**(E)-1-morpholino-4-(naphthalen-1-ylmethylene)-1,2-dihydroisoquinolin-3(4H)-one (23aB)**

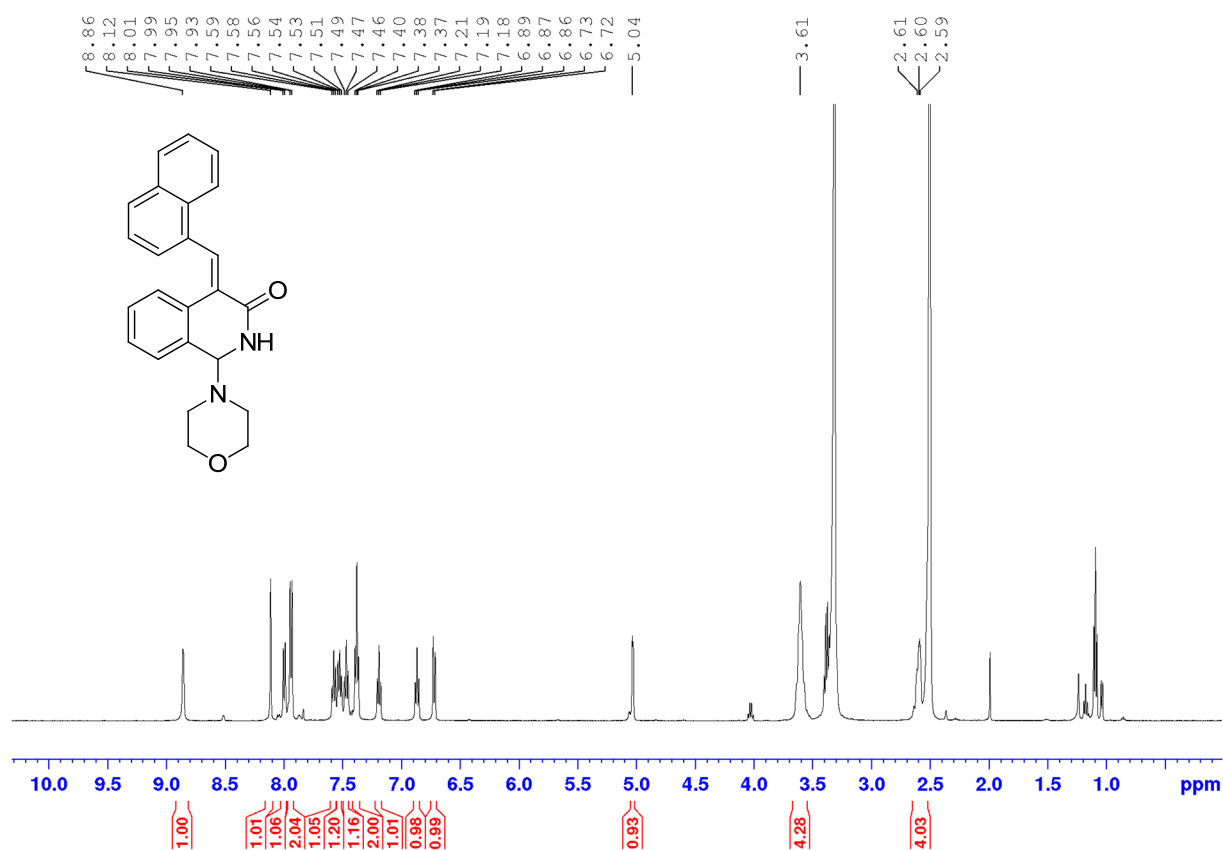

Figure S16. <sup>1</sup>H-NMR spectrum of **23aB**

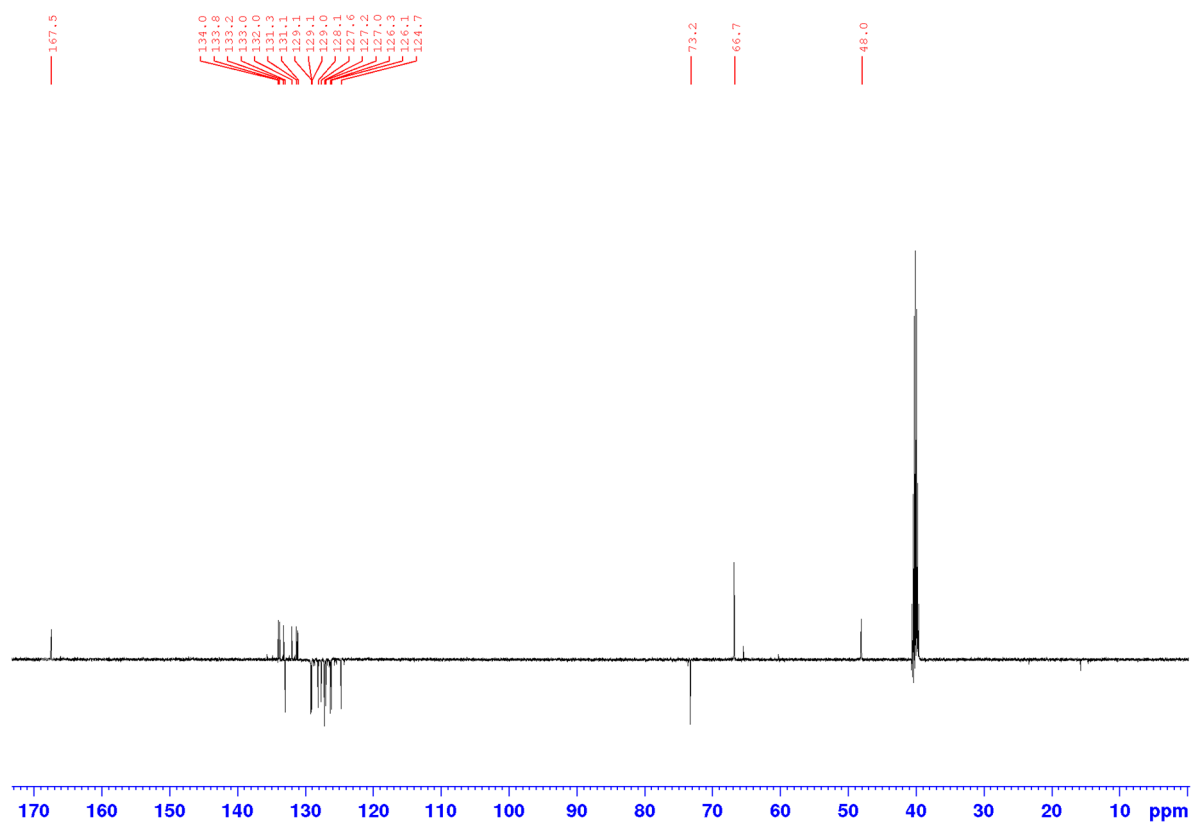

Figure S17. <sup>13</sup>C-NMR spectrum of **23aB**

4-(morpholino(phenyl)methyl)isoquinolin-3-ol (**23bA**)

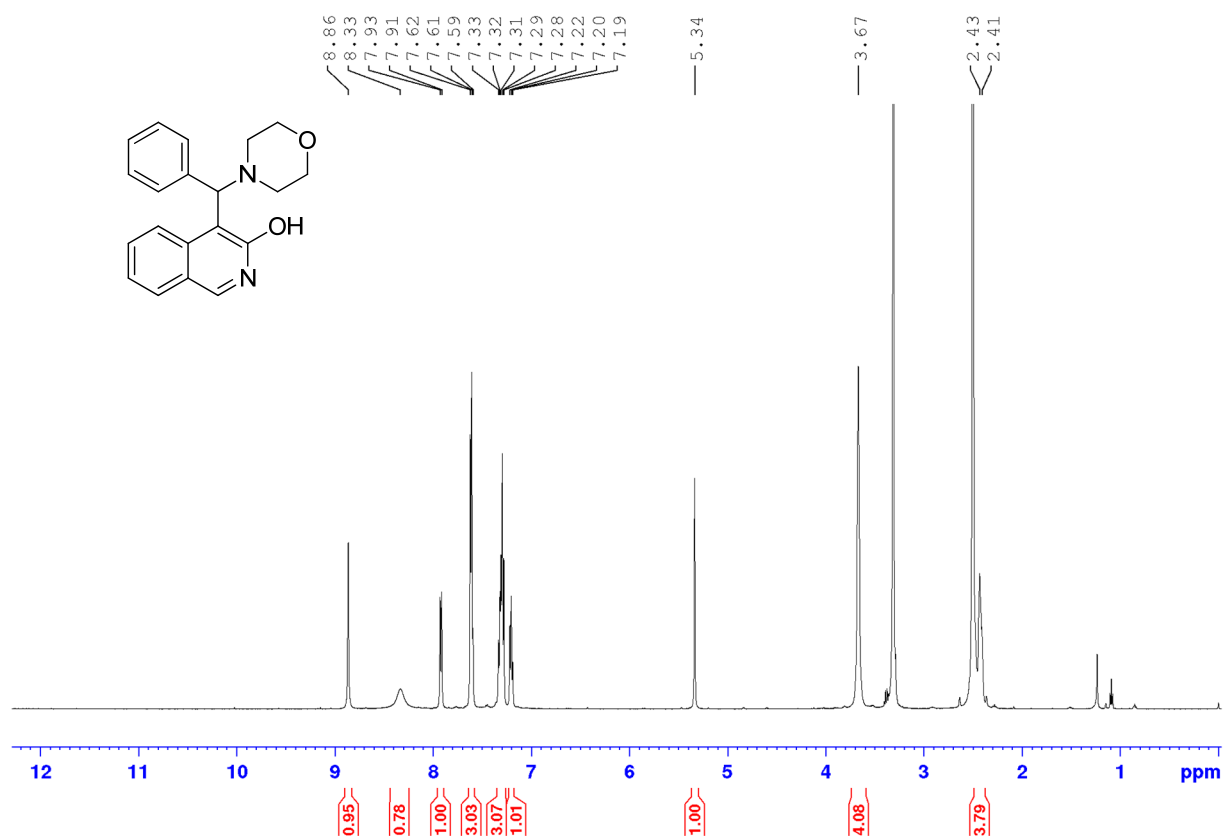

Figure S18. <sup>1</sup>H-NMR spectrum of **23bA**

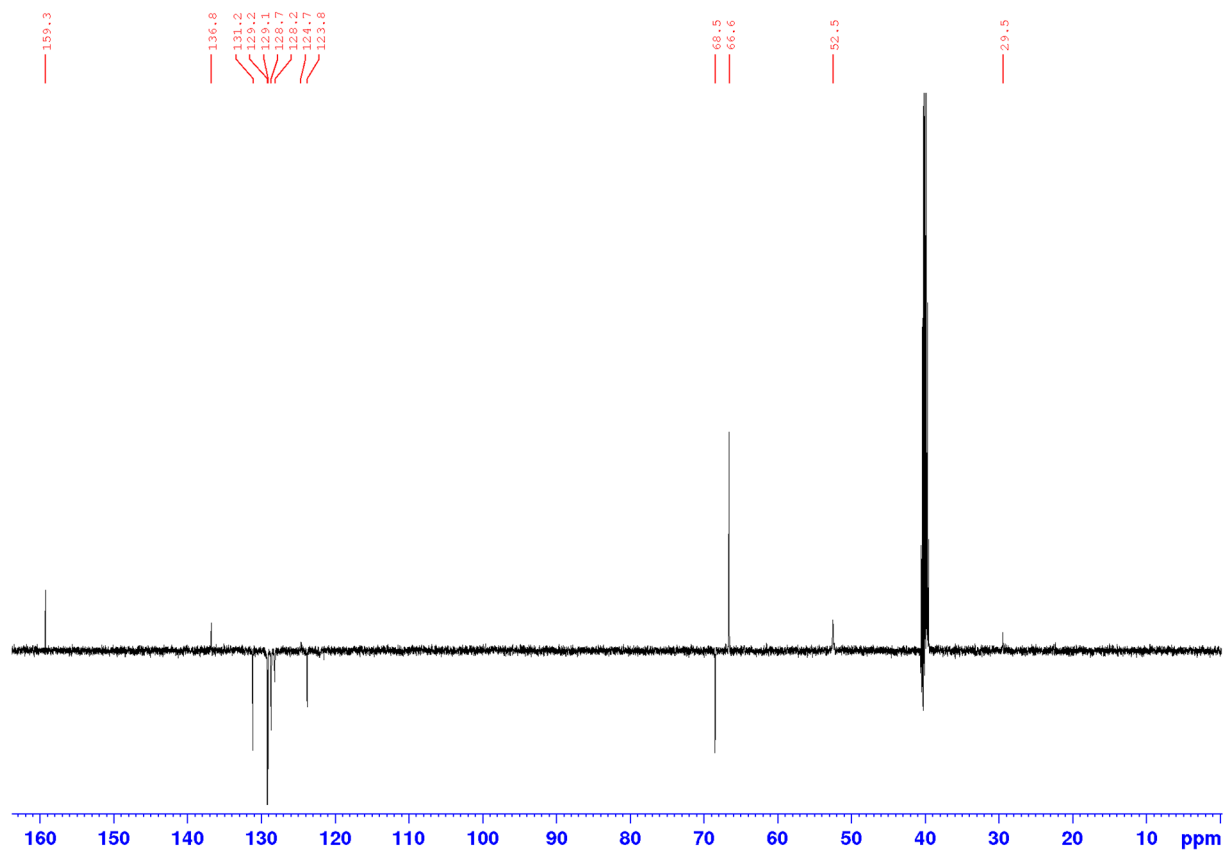

Figure S19. <sup>13</sup>C-NMR spectrum of **23bA**
